# Supplementary material
Source: Research Square preprint supplement (doi:10.21203/rs.3.rs-8532127/v1)
Supplement: Supplementary file 1 [file c9f7e78ba658febf57e2e776.docx]

**A bio-inspired synthetic efferocytosis chimeric receptor restores macrophage efferocytosis and inflammatory resolution after cardiac injury**

**Supporting Information**


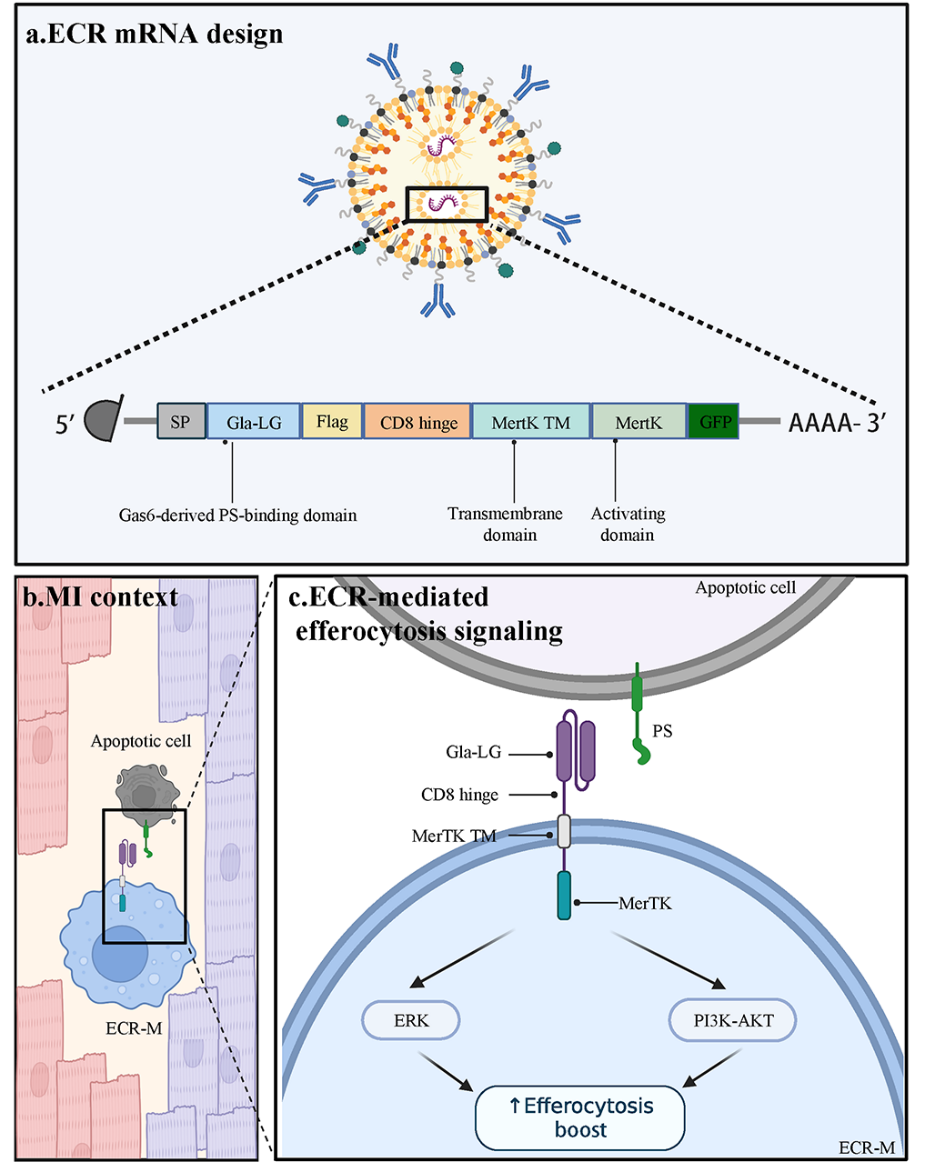


**Supplementary Figure 1.** Schematic illustration of ECR design and signaling. (a) Design of ECR-encoding mRNA packaged in targeted lipid nanoparticles. (b) Schematic depiction of ECR-expressing macrophages in the infarcted myocardium. (c) MerTK signaling pathways engaged upon phosphatidylserine recognition by ECR.


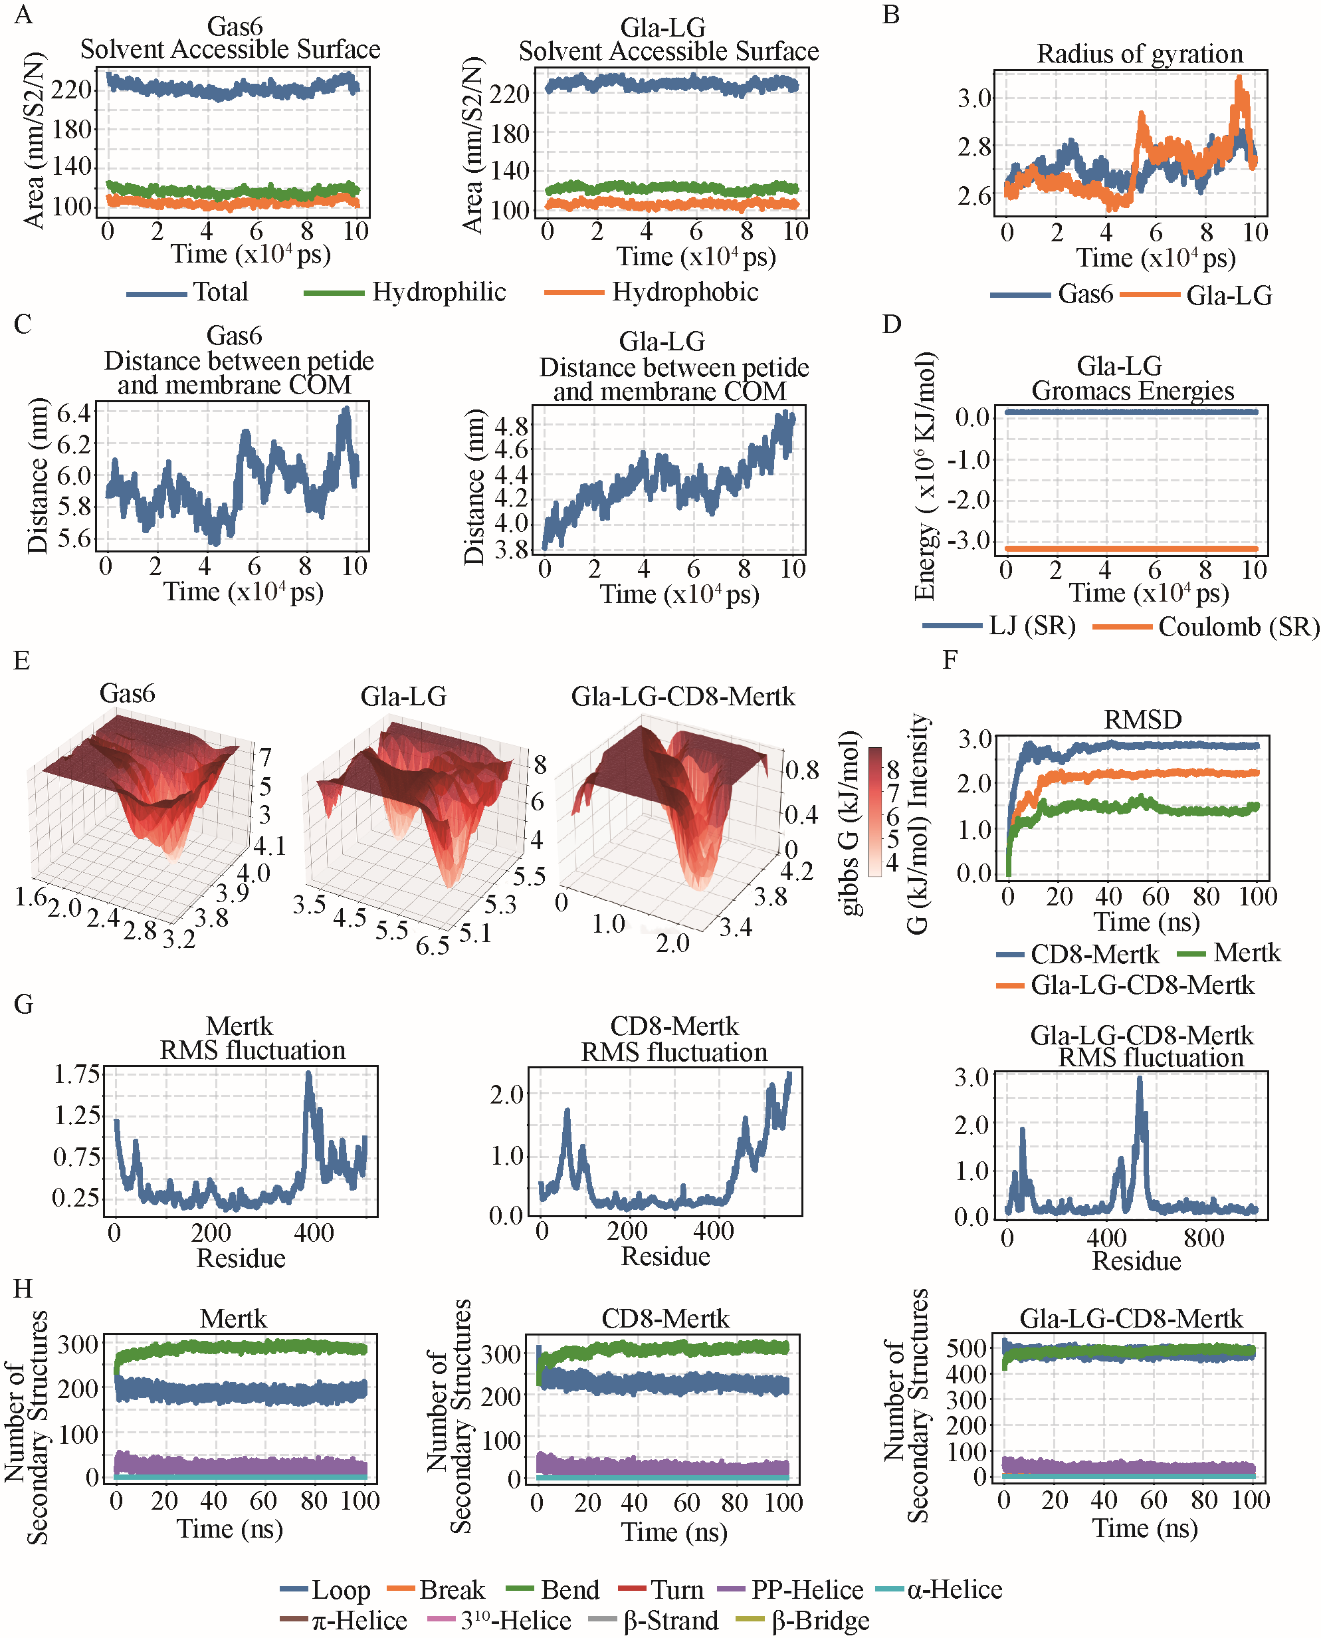


**Supplementary Figure 2. Molecular dynamics analyses of engineered ECR components.** (A) Time-dependent solvent-accessible surface area (SASA) of Gas6 and Gla–LG, showing total (blue), hydrophilic (green), and hydrophobic (orange) surface areas. (B)Radius of gyration (Rg) profiles of Gas6 (blue) and Gla-LG (orange) over the simulation period. **(C)** Time evolution of the distance between the peptide segment and the membrane center of mass (COM) for Gas6 and Gla-LG. (D) Lennard-Jones (LJ) and Coulombic energy components of Gla-LG plotted as a function of time. (E) Representative free energy landscapes of Gas6, Gla-LG, and Gla-LG-CD8-Mertk, generated using root mean square deviation (RMSD) and radius of gyration (Rg) as collective variables. Color gradients and contour lines denote energy magnitude and distribution. (F) RMSD profiles of Mertk, CD8-Mertk, and Gla-LG-CD8-Mertk throughout the simulation. (G) Root mean square fluctuation (RMSF) analysis of Mertk, CD8-Mertk and Gla-LG-CD8-Mertk. (H) Time-resolved secondary structure content of Mertk, CD8-Mertk, and Gla-LG-CD8-Mertk, including α-helix, β-strand, and turn elements.


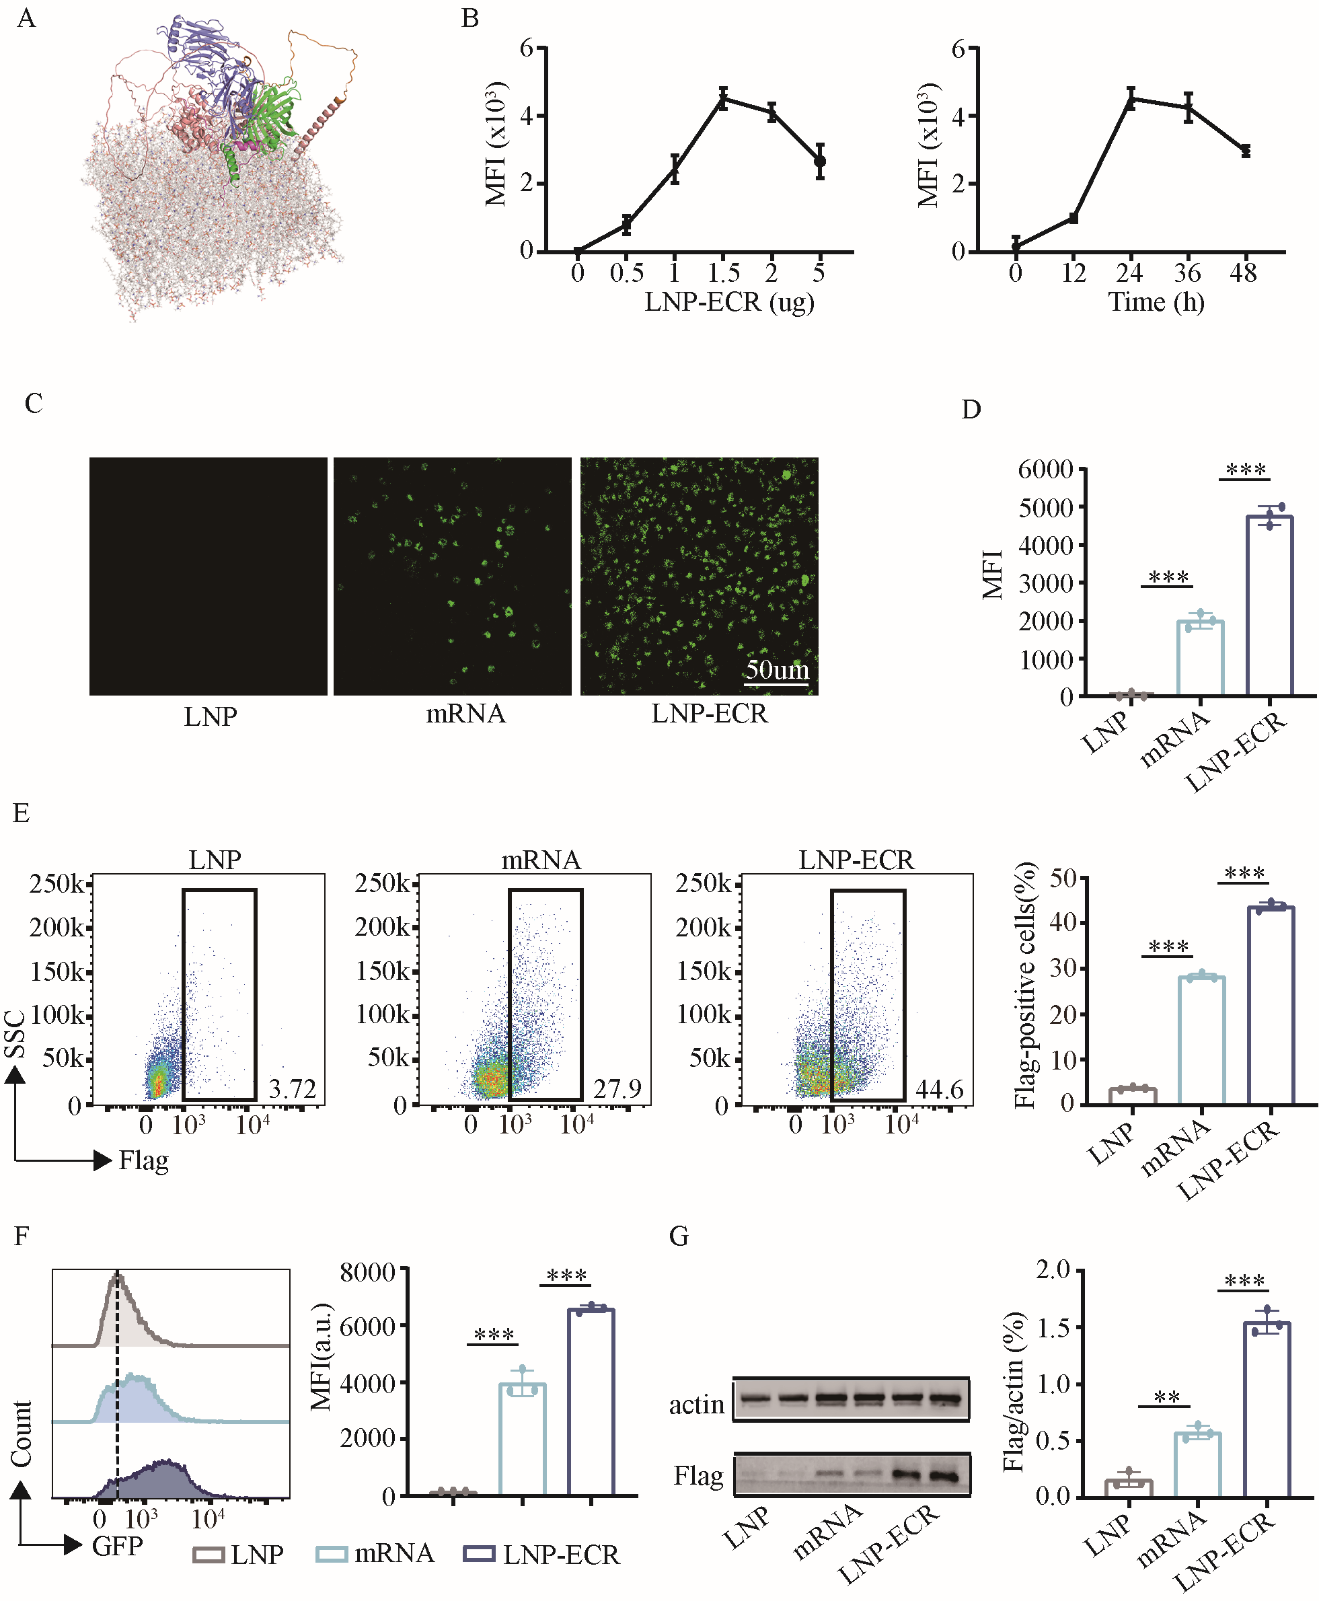


**Supplementary Figure 3. LNP-ECR mediated expression of the engineered ECR in BMDMs.** (A) Molecular dynamics simulation depicting interaction of the Gla-LG module with a PS-containing membrane. (B) GFP fluorescence intensity in BMDMs as a function of mRNA dose (left) and incubation time (right), quantified using ImageJ (n = 3). (C) CLSM images of BMDMs treated with LNP, mRNA, or LNP-ECR (GFP reporter) after 24 h. Scale bars, 50μm. **Statistical analysis of GFP fluorescence intensity was conducted in (D)** (n = 3)**.** (E) Flow cytometry analysis and quantification of Flag-positive BMDMs after treatment with LNP, mRNA, or LNP-ECR **(n = 3).** (F) Flow cytometry analysis and quantification of GFP-positive BMDMs under the same conditions **(n = 3)**. (G) Immunoblot detection of Flag-tagged ECR protein and β-actin, with densitometric quantification of Flag levels normalized to β-actin **(n = 3)**. Data are presented as mean ± SD. NSP > 0.05, *P < 0.05, **P < 0.01, ***P < 0.001.


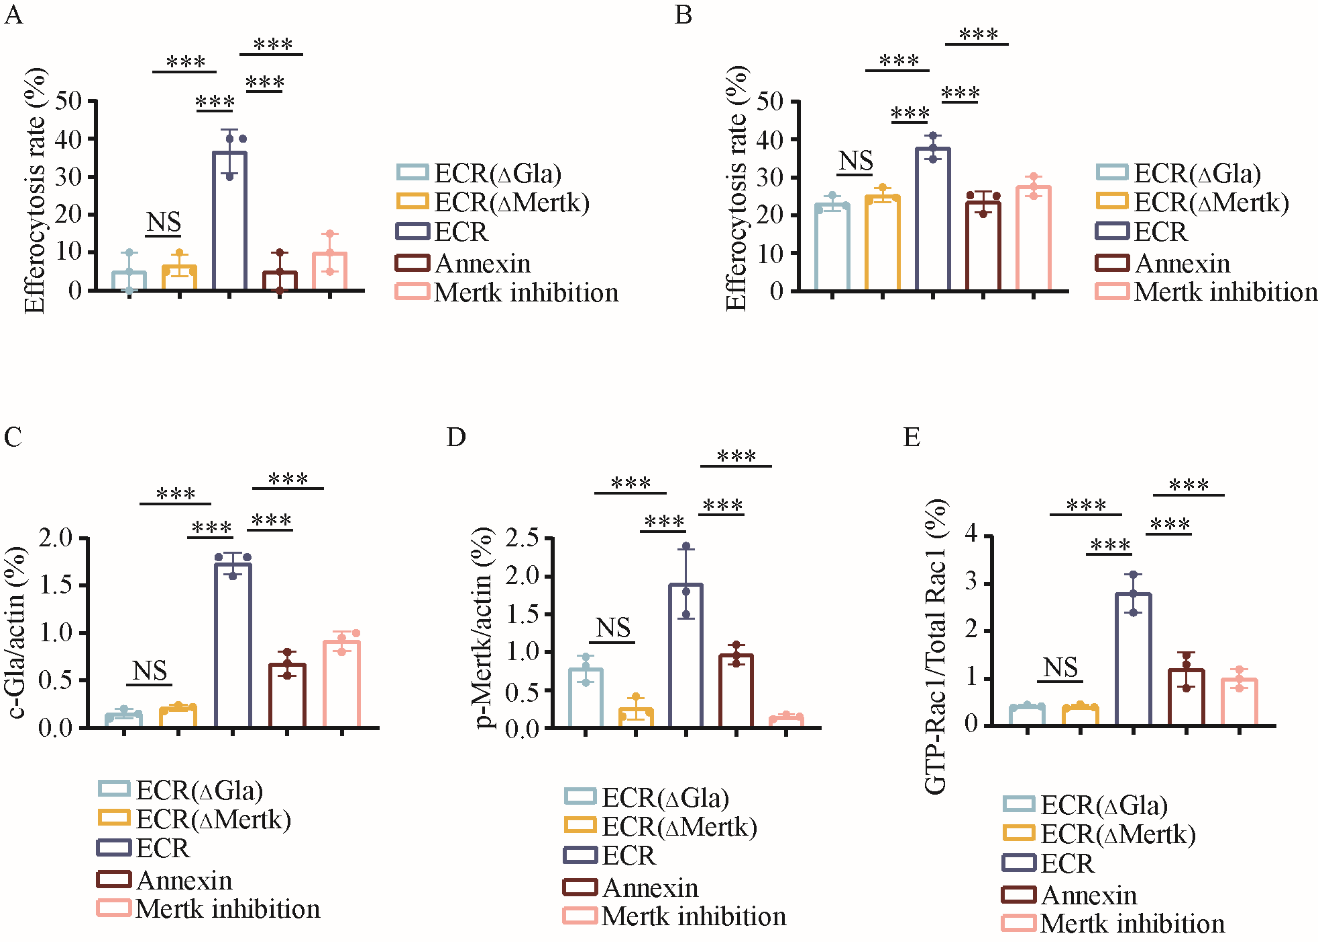


**Supplementary Figure 4. Functional validation of ECR. (A)** Quantification of apoptotic cardiomyocyte engulfment by BMDMs expressing ECR or its variants, or treated with Annexin V or Mertk inhibition, corresponding to Figure 2D (n = 3). (B) Statistical analyze of **the phagocytosis of labeled apoptotic cardiomyocytes by BMDMs subjected to different treatments in Fig.2E. (n = 3). (C-D)** **Quantification of relative** c-**Gla** **protein and p-Mertk protein levels normalized to β-actin (n = 3). (E) Quantification of relative** GTP-Rac1 **protein levels normalized to Total Rac1 protein levels (n = 3).** Data are presented as mean ± SD. NSP > 0.05, ***P < 0.001.


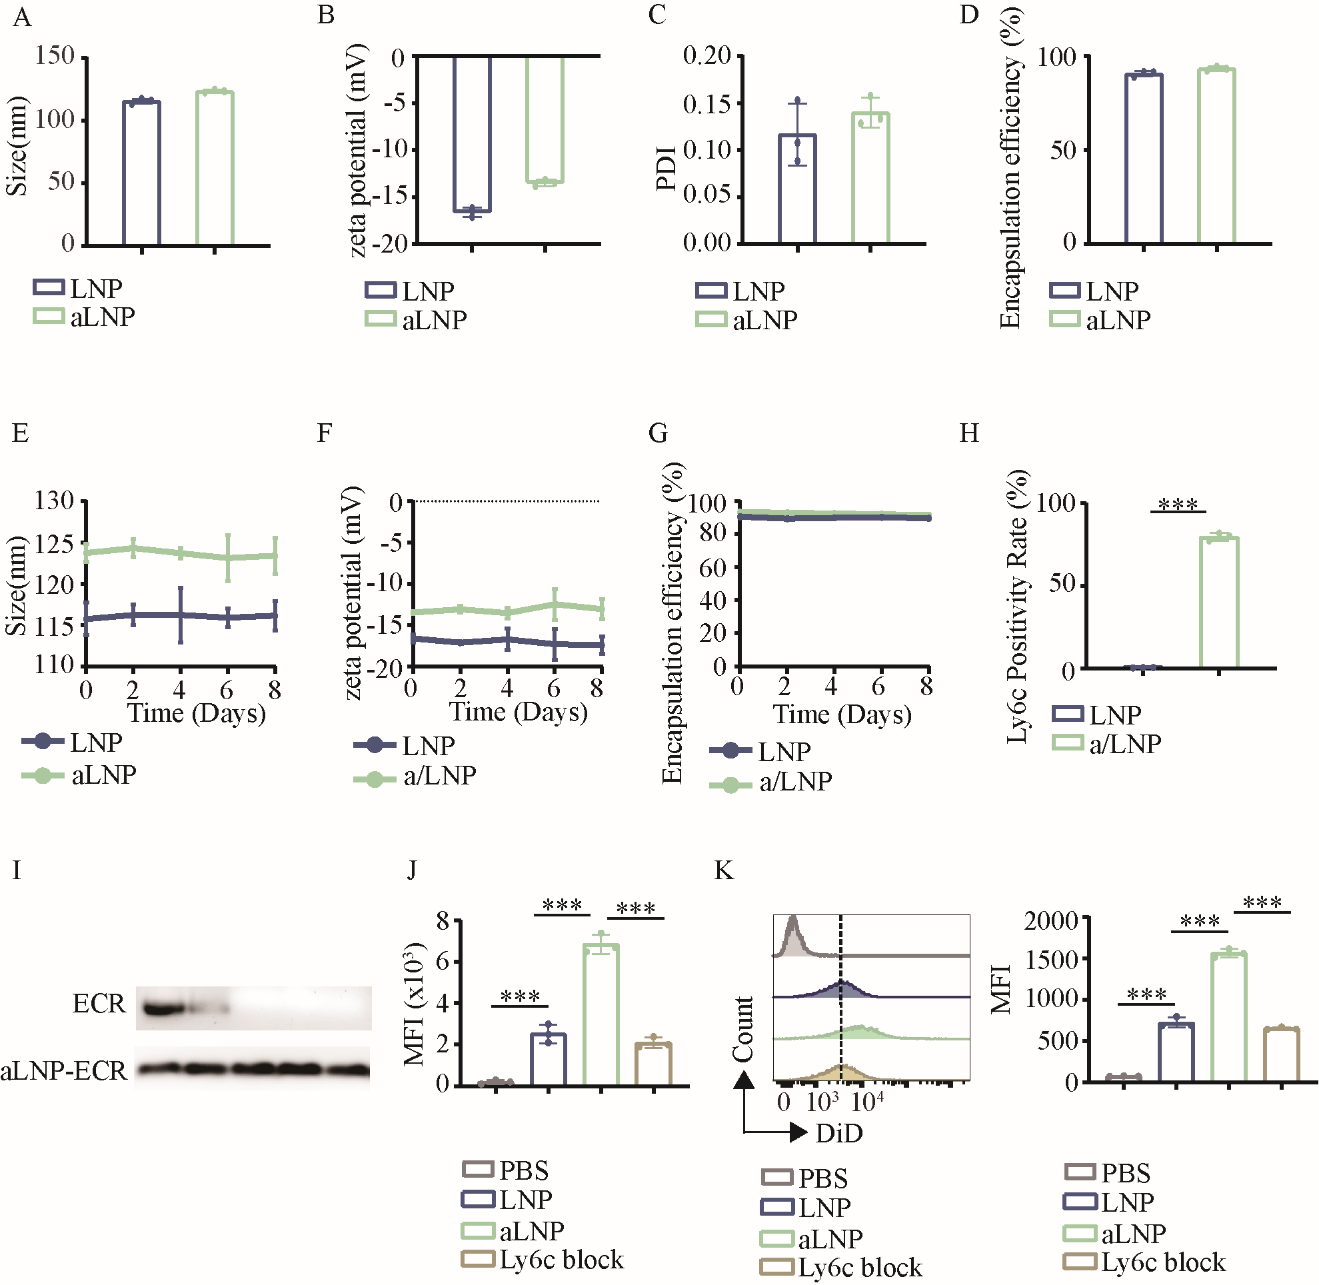


**Supplementary Figure 5.** **Physicochemical characterization and in vitro targeting of aLNP-ECR**. (A-B) Particle size (A) and zeta potential (B) of LNP-ECR (LNP) and aLNP-ECR (aLNP) (n = 3). (C) Polymer dispersity index (PDF) of LNP and aLNP (n = 3). (D) mRNA encapsulation efficiency of LNP and aLNP (n = 3). (E-F) **The variations in particle size (E), zeta potential (F) of lipid nanoparticles following storage at 4°C for 7 days. (G)** Encapsulation efficiency of LNP and aLNP **change after storage at 4°C for 7 days** (n = 3). (H) S**tatistical analysis of the nanoparticle flow cytometry results shown in Fig.3C.** (I)Stability of ECR mRNA in serum-containing medium at indicated timepoints, comparing free mRNA and aLNP-encapsulated mRNA. **(J)** Quantification of the accumulation of PBS, LNP, aLNP or anti-Ly6c-blocked aLNP-ECR in the BMMNCs based on the images in Fig.3D. (n = 3).(K) Flow cytometry analysis (left) and quantification (right) of PBS, DiD-labeled LNP, aLNP, or Ly6c-blocked aLNP binding to BMMNCs (n = 3). Data are presented as mean ± SD. NSP > 0.05, *P < 0.05, **P < 0.01, ***P < 0.001.


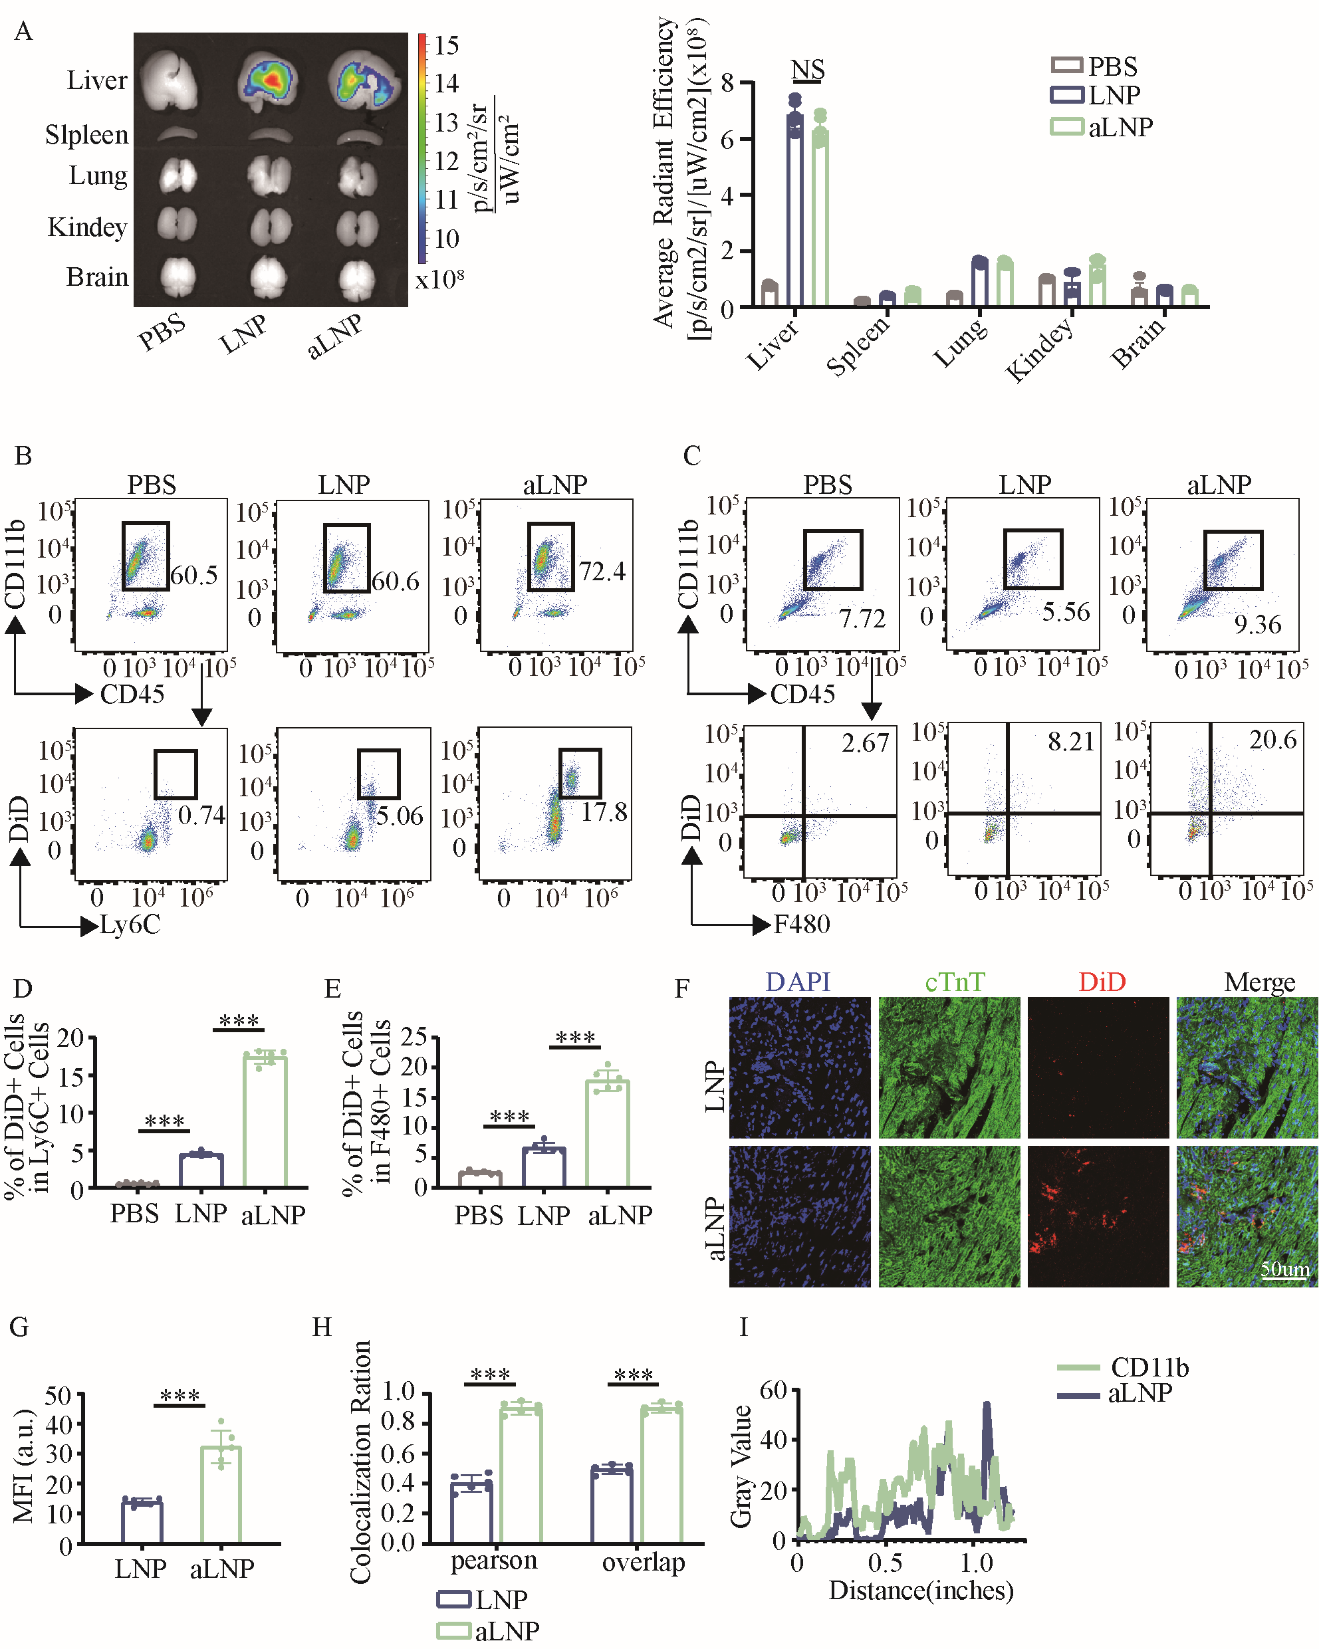


**Supplementary Figure 6. Biodistribution and Targeting Specificity of aLNP-ECR in vivo.** (A) IVIS images of major organs of MI/R mice after treated with PBS, DiD labeled LNP-ECR (LNP) or aLNP-ECR (aLNP) and quantitative analysis of the accumulation (n = 6). (B) Flow cytometry analysis of DiD⁺ Ly6c⁺ monocytes in peripheral blood 24 h after administration of PBS, LNP, or aLNP in MI/R mice; corresponding quantification is shown in (D) (n = 6). (C) Flow cytometry analysis of DiD⁺ F4/80⁺ macrophages isolated from infarcted myocardium 24 h after treatment with PBS, LNP, or aLNP; corresponding quantification is shown in (E) (n = 6). (F) Confocal **images** of heart sections showing the accumulation of LNP and aLNP after immunostained with cardiac troponin T (cTnT). DAPI (nuclei, blue), cTnT (green), DiD-LNP (red). Scalar bar, 50µm. (G) Quantification of DiD fluorescence intensity in infarcted myocardium corresponding to panel (F) (n=6). (H-I) The pearson's correlation, overlap coefficient (H) and the plot profile (I) from colocalization analyses of DiD-labeled nanoparticles with CD11b in the peri-infarct region, corresponding to Figure 3G, analyzed using ImageJ (n=6). Data are presented as mean ± SD. NSP > 0.05, *P < 0.05, **P < 0.01, ***P < 0.001.


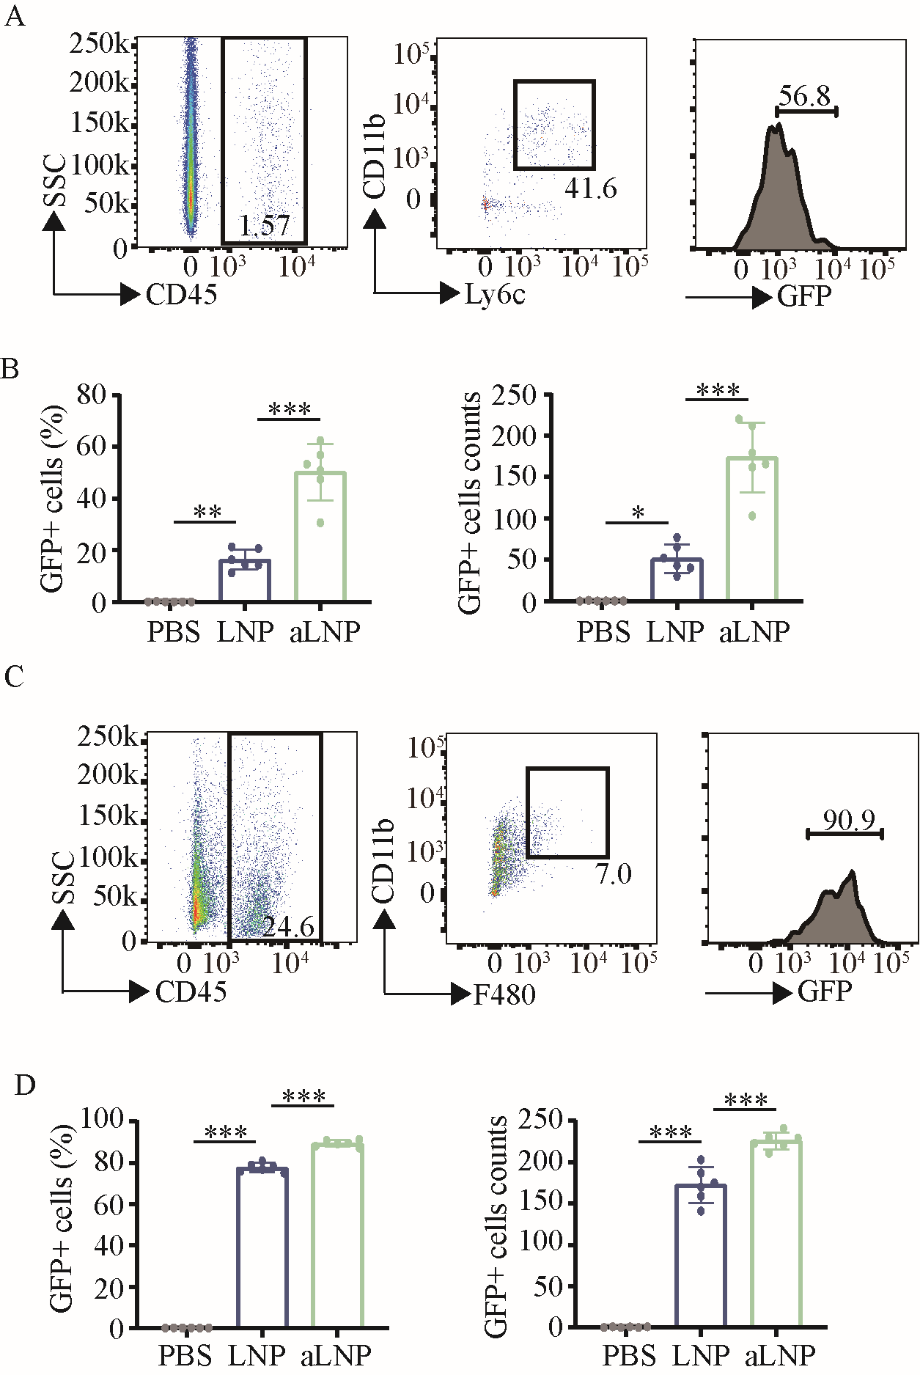


**Supplementary Figure 7. In vivo expression of ECR following aLNP-ECR administration. (A)** Flow cytometry gating strategy for identifying GFP⁺ Ly6c⁺ monocytes in peripheral blood, corresponding to Figure 3H; (B) Quantification of GFP⁺ Ly6c⁺ monocytes (n = 6)**. (C)** Flow cytometry gating strategy for identifying GFP⁺ F4/80⁺ macrophages in infarcted myocardium, corresponding to Figure 3I; (D) Quantification of GFP⁺ F4/80⁺ macrophages (n = 6)**.** Data are presented as mean ± SD. NSP > 0.05, *P < 0.05, **P < 0.01, ***P < 0.001.


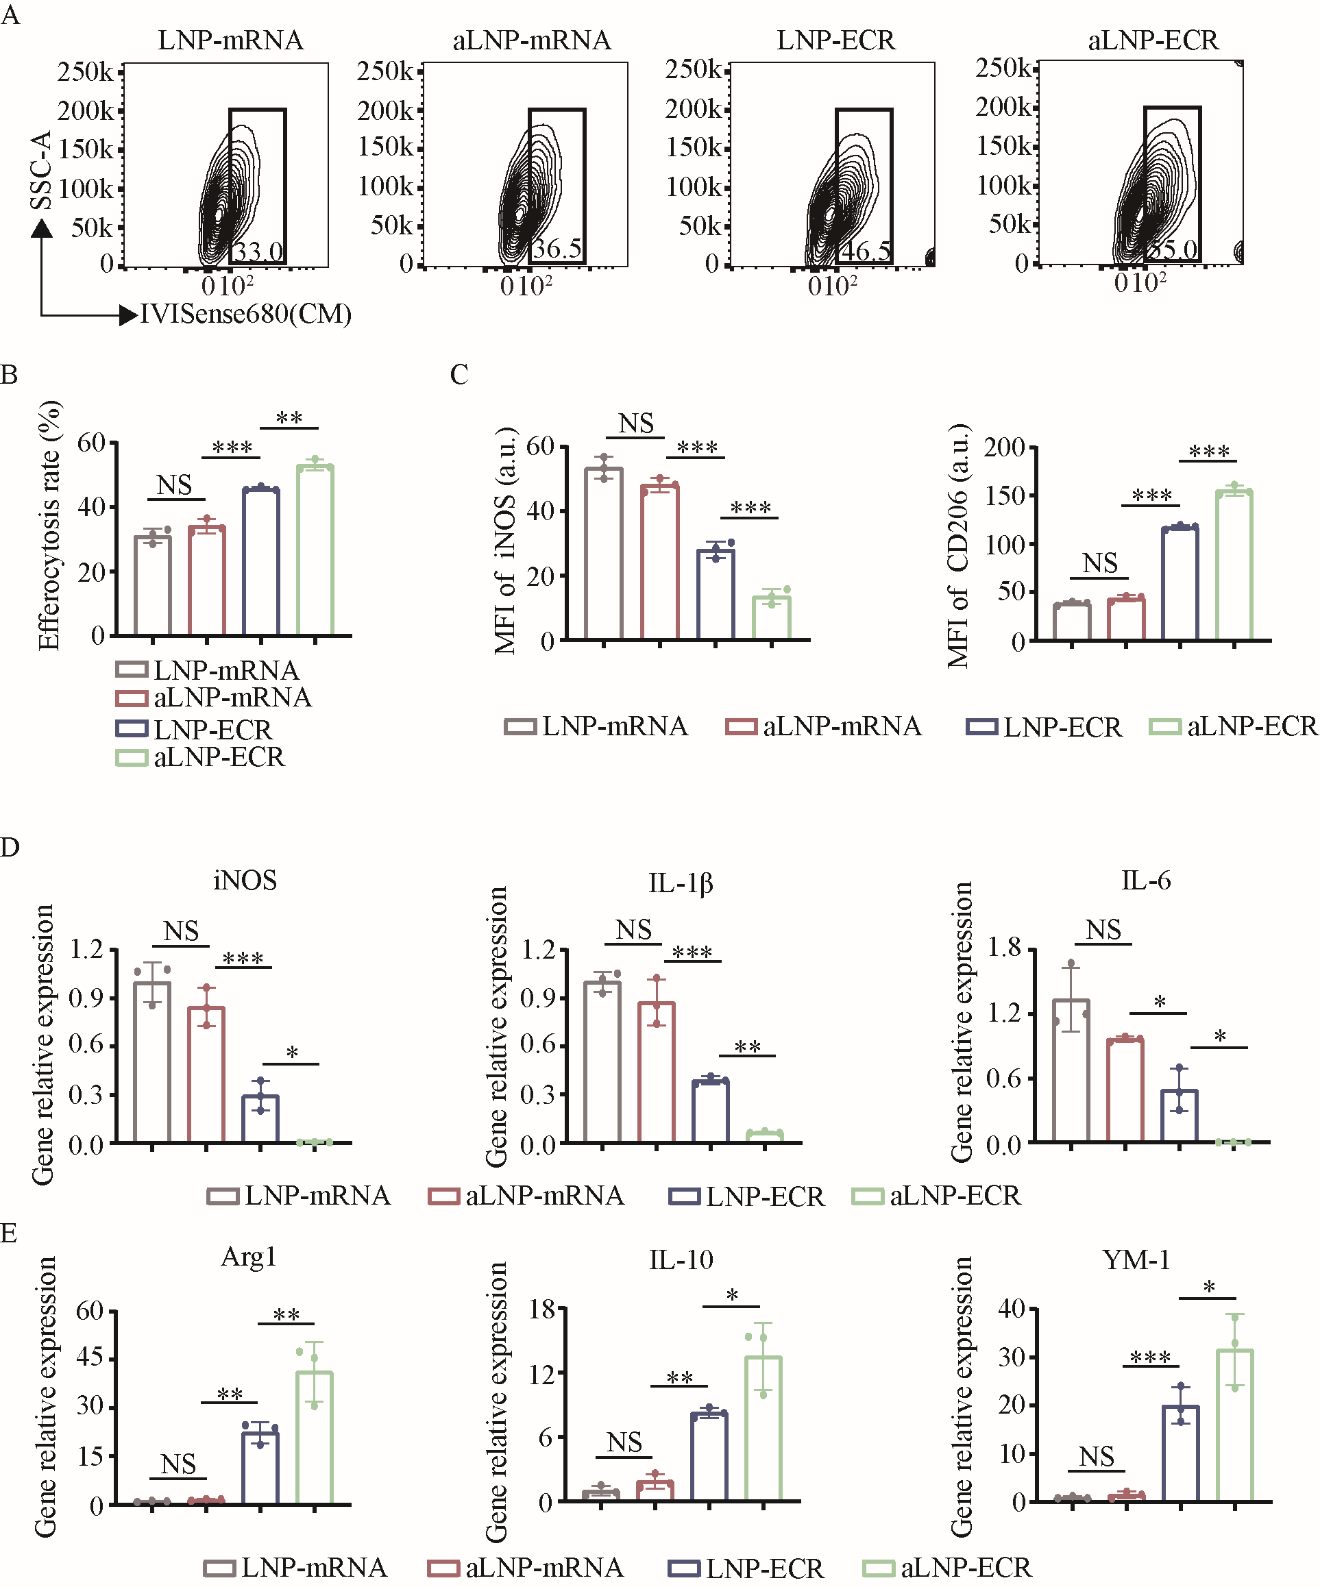


**Supplementary Figure 8.** **In vitro functional characterization of ECR-expressing macrophages. (A)** Flow cytometry analysis of apoptotic cardiomyocyte uptake by BMDMs treated with LNP-mRNA, aLNP-mRNA, LNP-ECR, or aLNP-ECR. (B) Quantification of efferocytosis rates corresponding to panel (A) **(**n = 3)**.** (C) Quantification of iNOS (M1-associated) and CD206 (M2-associated) immunofluorescence intensity shown in Fig.4H (n = 3). (D) RT-qPCR analysis of M1-associated gene expression (iNOS, IL-1𝛽, IL-6) in BMDMs after treated by LNP-mRNA, aLNP-mRNA, LNP-ECR or aLNP-ECR (n = 3). (E) RT-qPCR analysis of M2-associated gene expression (Arg-1, IL-10, YM-1) in BMDMs after treated by LNP-mRNA, aLNP-mRNA, LNP-ECR or aLNP-ECR (n = 3). Data are presented as mean ± SD. NSP > 0.05, *P < 0.05, **P < 0.01, ***P < 0.001.


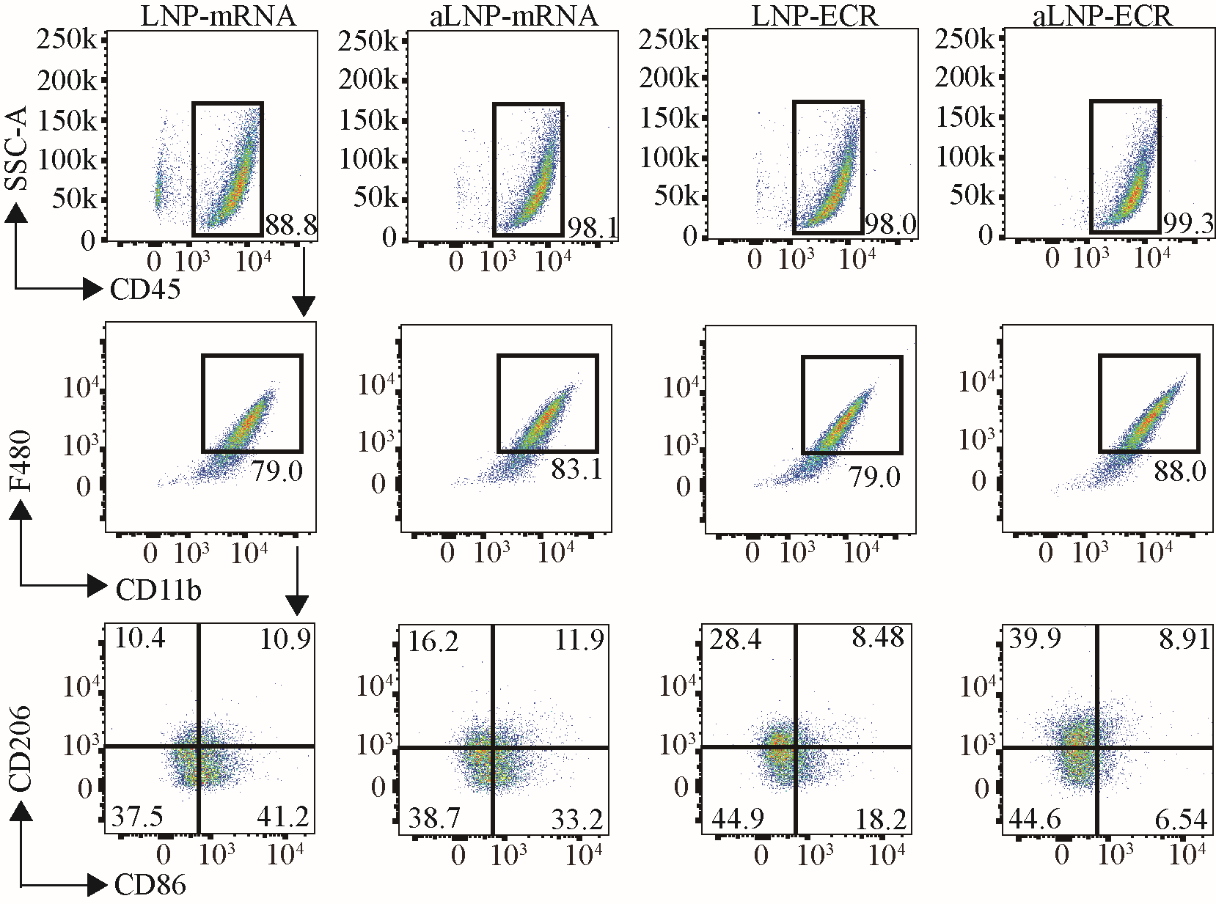


**Supplementary Figure 9.** Flow cytometry gating strategy for macrophage subset analysis. Flow cytometry gating strategy used to identify macrophage subsets analyzed in Figure 4I.


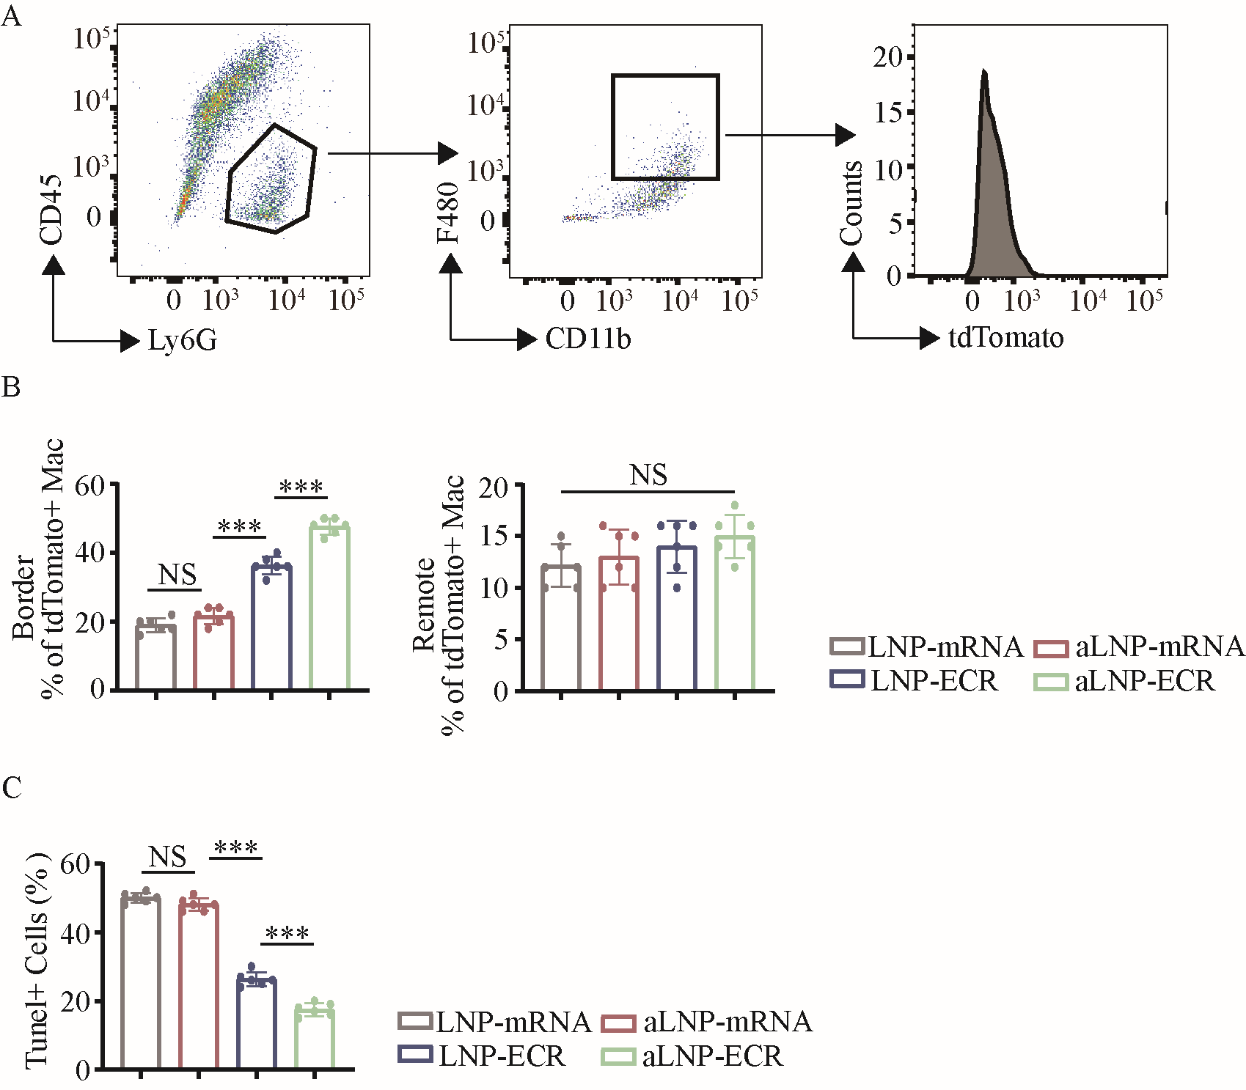


**Supplementary Figure 10.** **aLNP-ECR enhances macrophage efferocytosis in vivo.** (A) Gating strategy for flow cytometric identification of cardiac macrophages and detection of tdTomato signals, corresponding to the analysis shown in Figure 6A. **(B)** Quantification of tdTomato-positive macrophages in the infarct border zone and remote myocardial regions following indicated treatments, corresponding to the confocal imaging shown in Figure 6B **(n = 6).** **(C)** Quantification of Tunel-positive cells in infarcted hearts subjected to MI/R after the indicated treatments, corresponding to the confocal images shown in Figure 6C (**n = 6)**. Data are presented as mean ± SD, NSP > 0.05, *P < 0.05, *P < 0.01, *P < 0.001.


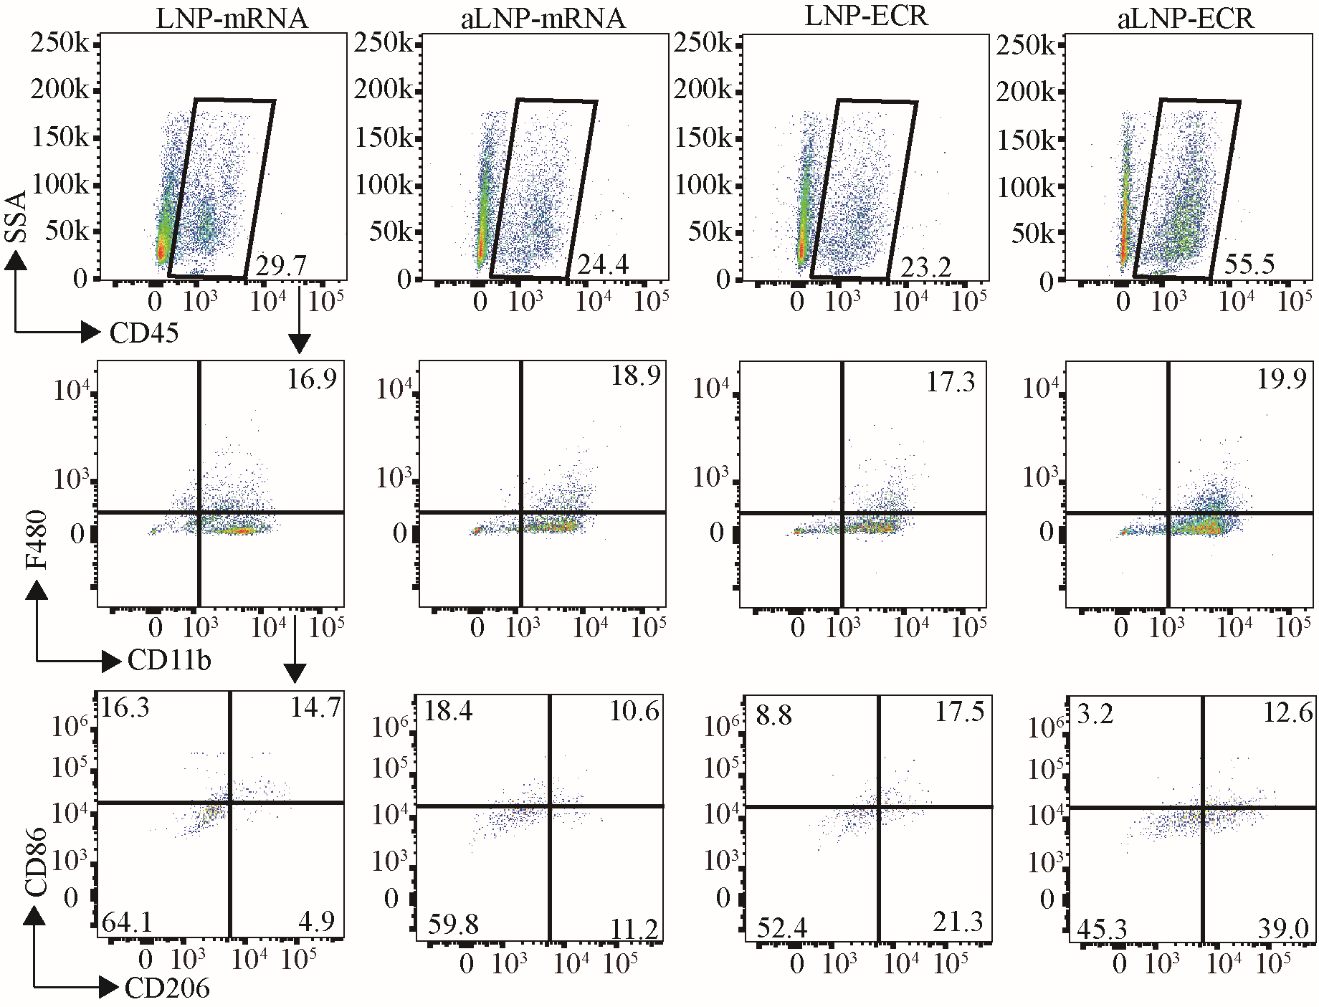


**Supplementary Figure 11.** Flow cytometric gating strategy for macrophage subset analysis. Representative flow cytometry plots illustrating the sequential gating strategy used to identify cardiac macrophages and to define CD86⁺ (M1-like) and CD206⁺ (M2-like) macrophage subsets, corresponding to the analysis shown in Figure 6D.


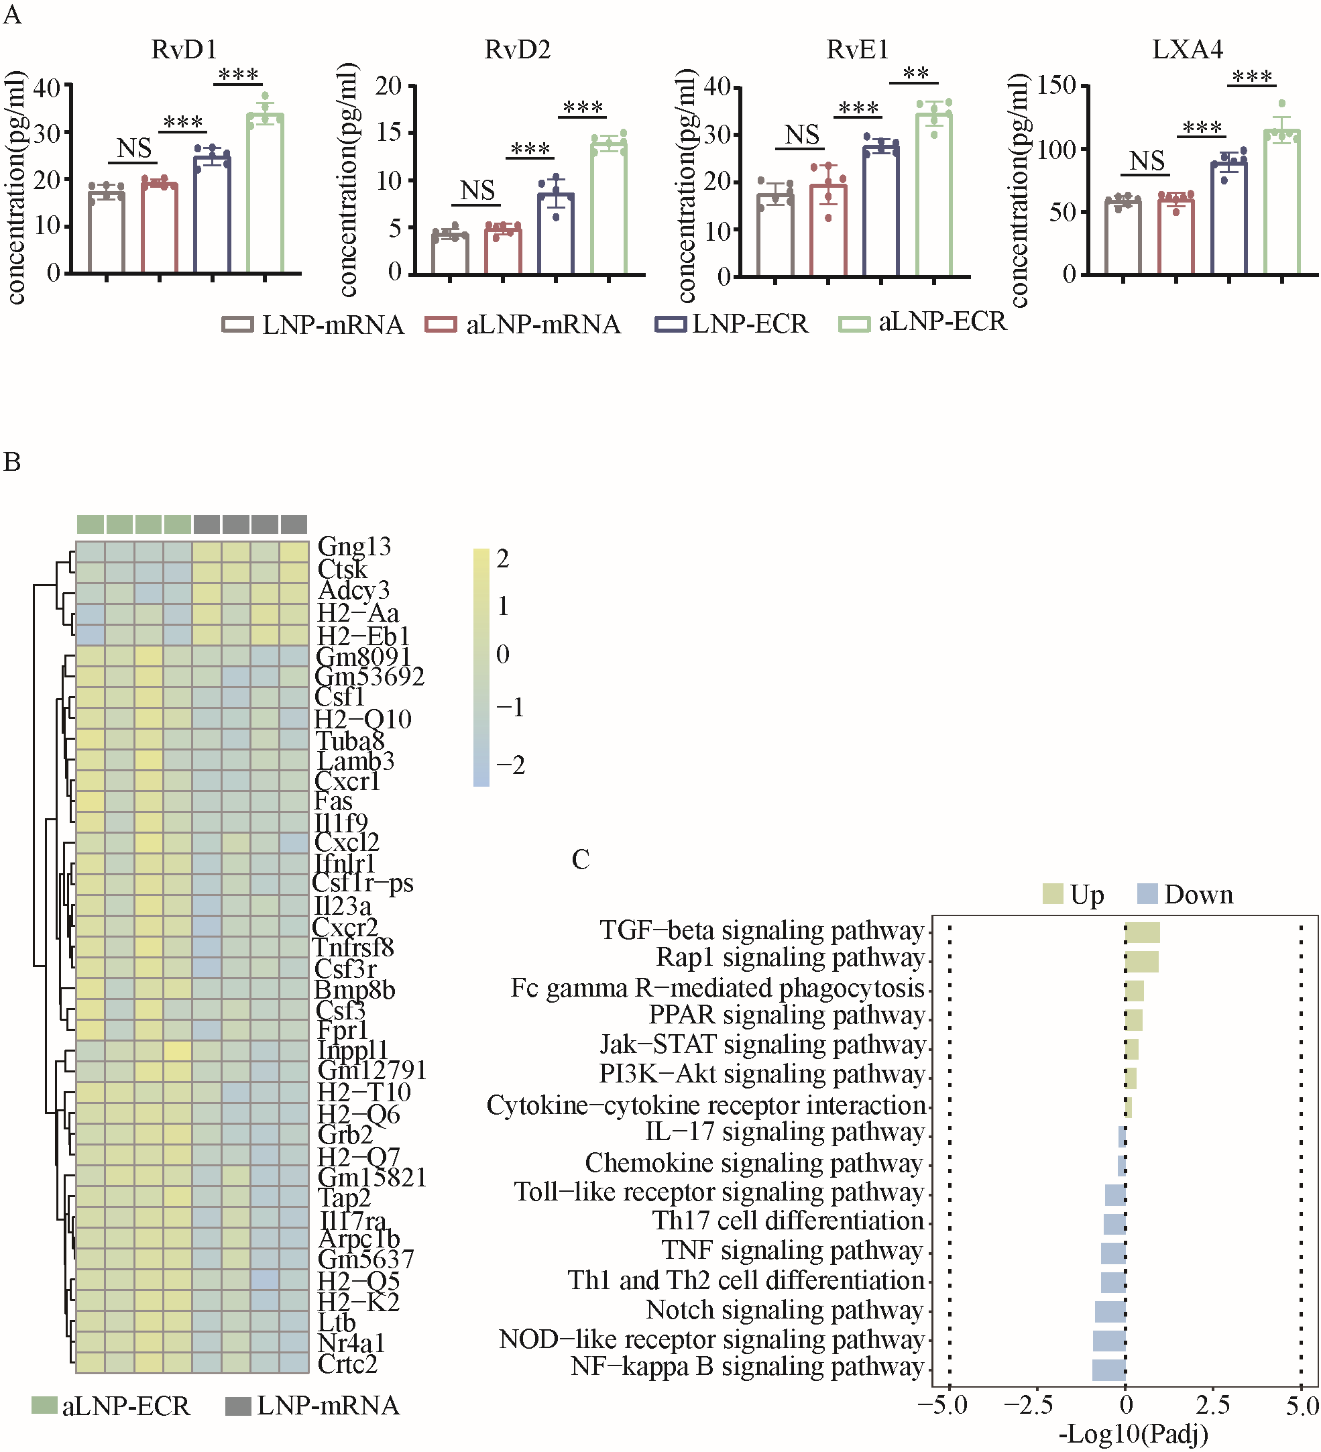


**Supplementary Figure 12.** **aLNP-ECR modulates the post-infarction immune microenvironment in vivo. (A)** **ELISA analysis of** specialized pro-resolving mediators (SPMs), including resolvin D1 (RvD1), resolvin D2 (RvD2), resolvin E1 (RvE1), and lipoxin A4 (LXA4), in heart homogenates from MI/R mice following treatment with LNP-mRNA, aLNP-mRNA, LNP-ECR, or aLNP-ECR **(n = 6). (B)** Hierarchical clustering heatmap of differentially expressed genes identified by bulk RNA sequencing of infarct-region tissue comparing the LNP-mRNA and aLNP-ECR treatment groups (n = 6). **(C)** KEGG pathway enrichment analysis of genes upregulated and downregulated in infarct-region tissue from aLNP-ECR treated mice relative to LNP-mRNA controls. **Data are presented as mean ± SD, NSP > 0.05, *P < 0.05, *P < 0.01, *P < 0.001.**


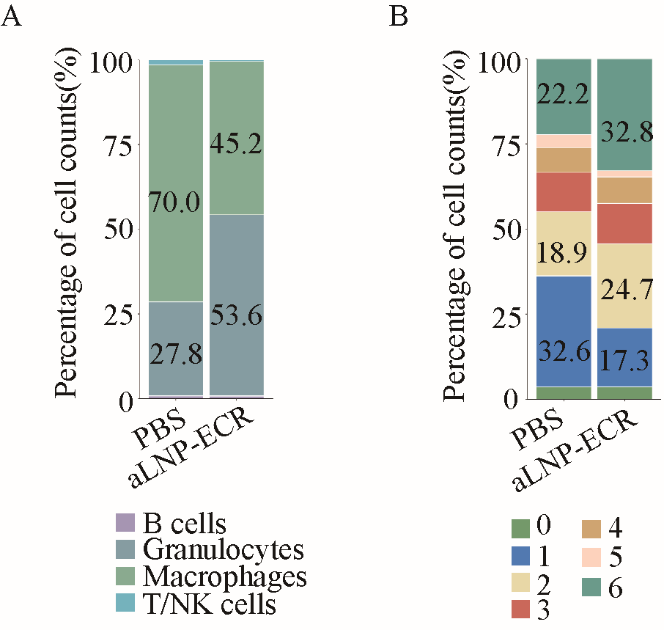


**Supplementary Figure 13.** (A) Relative proportions of major immune cell populations in Figure 7A for the PBS and aLNP‑ECR treated hearts (n = 3). (B) Distribution of macrophage subsets in Figure 7A for PBS and aLNP-ECR treated hearts, showing a redistribution of macrophage states following aLNP-ECR treatment (n = 3).

**
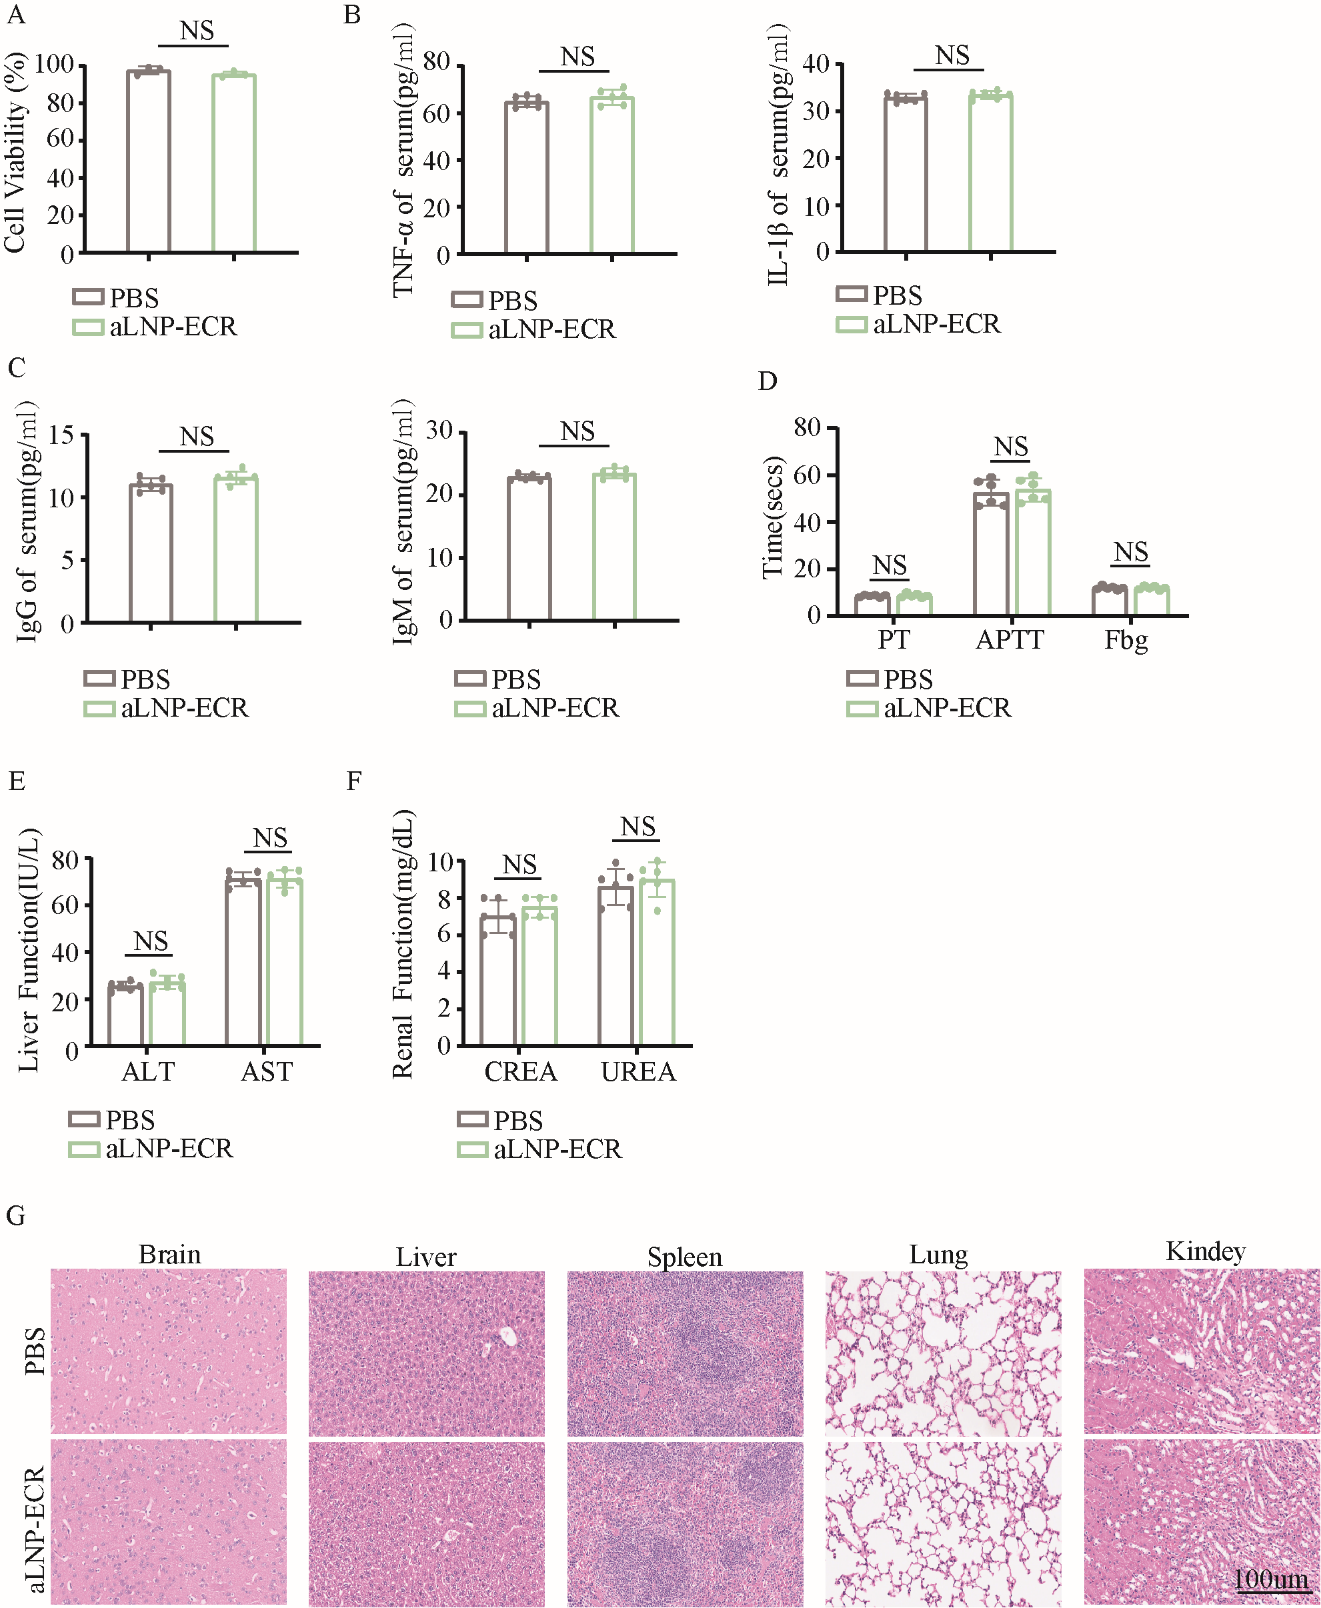
**

**Supplementary Figure 14. Safety Evaluation of aLNP-ECR.** (A) Relative cell viability of BMDMs following treatment with aLNP-ECR, as assessed by CCK-8 assay(n = 3). (B) Serum concentrations of pro-inflammatory cytokines TNF-α and IL-1β in healthy mice at 3 days after intravenous administration of PBS or aLNP-ECR, measured by ELISA (n = 6). (C) Serum levels of IgG and IgM in healthy mice following PBS or aLNP-ECR administration, assessed by ELISA (n = 6). (D) **Coagulation** parameters **(PT, APTT and Fbg) in healthy mice after administration** of PBS or **aLNP-ECR** (n = 6)**.** Biochemical test of (E) liver and (F) renal function of healthy mice after PBS or **aLNP-ECR** administered (n = 6). (G) Representative HE–stained sections of major organs (brain, liver, spleen, lung, and kidney) harvested from healthy mice treated with PBS or aLNP-ECR. Scalar bar, 100 μm. Data are presented as mean ± SD. NSP>0.05

**Table 1.** Murine ECRmRNA sequence

| Murine  Gla-LG  -CD8-Mertk | Signal Peptide  (SP) | ATGCCGCCACCGCCCGGGCCCGCCGCCGCCCTGGGCACTGCGCTTCTGCTGCTCCTGCTGGCTTCCGAGTCTTCTCACACT |
| --- | --- | --- |
| Murine Gla-LG | TCGAGAACGACCCCGAGACGGAGTATTTCTATCCACGATATCAAGAGGGCGGCGGCGGCTCCGGCGGCGGCGGCTCCGGCGGCGGCGGCTCCGGCCGCATGTTCAGCGGGACCCCCGTGATTAGACTACGCTTCAAGAGGCTTCAGCCTACCAGGCTGCTGGCTGAATTTGACTTCCGCACTTTTGACCCTGAAGGAGTCCTCTTCTTCGCTGGAGGCCGTTCAGACAGCACCTGGATTGTCCTGGGCCTAAGAGCTGGGCGGCTTGAGCTGCAGCTTCGGTACAATGGCGTTGGGCGCATCACCAGCAGCGGGCCAACCATCAACCACGGCATGTGGCAAACTATCTCCGTGGAAGAGCTGGAACGTAACCTTGTCATCAAGGTCAACAAAGATGCTGTAATGAAGATCGCGGTAGCTGGGGAGCTGTTTCAGCTGGAGAGGGGCCTCTATCACCTGAATCTCACCGTGGGCGGCATTCCCTTCAAGGAGAGTGAGCTCGTCCAGCCGATTAACCCTCGCCTGGATGGGTGCATGAGGAGTTGGAACTGGCTGAACGGGGAAGACAGCGCCATCCAGGAGACAGTCAAGGCAAACACAAAAATGCAGTGCTTCTCTGTGACAGAAAGGGGCTCCTTCTTCCCGGGGAATGGATTTGCTACCTACAGGCTCAACTACACCCGAACATCGCTGGATGTCGGCACGGAAACCACCTGGGAAGTTAAAGTTGTGGCTCGGATCCGCCCTGCCACGGACACGGGGGTGCTGCTGGCGCTGGTGGGGGACGACGATGTCGTCCCCATCTCTGTGGCCCTAGTCGACTACCACTCTACAAAGAAGCTCAAGAAGCAGTTGGTGGTCCTGGCAGTTGAGGATGTTGCCCTGGCACTGATGGAAATCAAGGTGTGCGACAGCCAGGAACACACGGTCACTGTCTCCCTGCGGGAGGGTGAGGCCACCCTAGAAGTGGATGGCACAAAGGGCCAGAGTGAAGTGAGCACTGCCCAGCTGCAGGAGCGACTGGACACACTTAAGACACATCTGCAAGGCTCTGTGCACACCTATGTTGGAGGCCTGCCAGAAGTATCGGTGATTTCTGCACCCGTCACTGCGTTCTACCGCGGATGCATGACTCTGGAGGTAAACGGGAAAATCCTGGACCTGGATACGGCCTCGTACAAGCACAGTGACATCACCTCCCACTCCTGC |
| Flag | GATTACAAGGATGATGATGATAAGGATTACAAGGATGATGATGATAAGTAATAG |
| Murine CD8a hinge | ATCAGCAACTCGGTGATGTACTTCAGTTCTGTCGTGCCAGTCCTTCAGAAAGTGAACTCTACTACTACCAAGCCAGTGCTGCGAACTCCCTCACCTGTGCACCCTACCGGGACATCTCAGCCCCAGAGACCAGAAGATTGTCGGCCCCGTGGCTCAGTGAAGGGGACCGGATTGGACTTC |
| Murine Mertk TM  and activation domain | TTCATCATCCTCGGCTGCTTCTGTGGATTCATTTTAATCGGGTTAATTTTGTGTATTTCTCTGGCCCTCAGAAGGAGAGTCCAGGAAACAAAGTTTGGGGGAGCATTCTCTGAGGAGGATTCCCAACTGGTCGTAAATTATAGAGCGAAGAAGTCCTTCTGCCGGCGAGCCATCGAGCTTACCTTGCAGAGCCTGGGAGTGAGCGAGGAGCTGCAGAATAAGCTGGAAGATGTTGTGATTGACAGAAACCTTCTGGTTCTCGGCAAAGTTCTGGGTGAAGGAGAGTTTGGGTCTGTAATGGAAGGAAATTTGAAGCAAGAAGATGGGACTTCTCAGAAGGTGGCAGTGAAGACCATGAAGTTGGACAACTTTTCTCAACGGGAGATCGAGGAGTTTCTCAGCGAAGCAGCATGCATGAAAGACTTCAACCACCCAAATGTCATCCGACTTCTAGGCGTGTGTATAGAACTGAGCTCTCAAGGCATCCCGAAGCCCATGGTGATTTTACCCTTCATGAATACGGAGACCTCCACACCTTCCTGTTATATTCCCGATTAAACACAGGACCCAAGTACATTCACCTGCAGACACTACTGAAGTTCATGATGGACATTGCCCAGGGAATGGAGTATCTGAGCAACAGGAATTTTCTTCATAGGGATTTGGCAGCTCGAAACTGCATGTTGCGGGATGACATGACTGTCTGCGTGGCAGACTTTGGCCTCTCAAAGAAGATTTACAGTGGTGATTATTACCGCCAAGGCCGCATTGCCAAAATGCCTGTGAAGTGGATCGCCATCGAGAGCCTGGCGGACCGAGTCTACACAAGCAAAAGTGACGTGTGGGCTTTTGGCGTGACCATGTGGGAAATAACAACACGGGGAATGACTCCCTATCCCGGAGTTCAGAACCATGAGATGTACGACTACCTTCTCCACGGCCACAGGCTGAAGCAGCCTGAGGACTGCTTGGATGAACTGTATGACATCATGTACTCTTGCTGGAGTGCTGATCCCTTGGATCGACCCACCTTCTCTGTGTTGAGGCTGCAGCTGGAAAAGCTCTCCGAGAGTTTGCCTGATGCGCAGGACAAAGAATCCATCATCTACATCAATACCCAGTTGCTAGAGAGCTGCGAGGGCATAGCCAATGGGCCCTCACTCACGGGCTAGACATGAACATTGACCCTGACTCCATCATTGCCTCTTGCACACCAGGCGCTGCCGTCAGCGTGGTCACGGCAGAAGTTCACGAGAACAACCTTCGTGAGGAAAGATACATCTTGAATGGGGGCAATGAGGAATGGGAAGATGTGTCCTCCACTCCTTTTGCTGCAGTCACACCTGAAAAGGATGGTGTCTTACCGGAGGACAGACTCACCAAAAATGGCGTCTCCTGGTCTCACCATAGTACACTACCCTTGGGGAGCCCATCACCAGATGAACTTTTATTTGTAGATGACTCCTTGGAAGACTCTGAAGTTCTGATGTGA |
| GFP | ATGGTGAGCAAGGGCGAGGAGCTGTTCACCGGGGTGGTGCCCATCCTGGTCGAGCTGGACGGCGACGTAAACGGCCACAAGTTCAGCGTGTCCGGCGAGGGCGAGGGCGATGCCACCTACGGCAAGCTGACCCTGAAGTTCATCTGCACCACCGGCAAGCTGCCCGTGCCCTGGCCCACCCTCGTGACCACCCTGACCTACGGCGTGCAGTGCTTCAGCCGCTACCCCGACCACATGAAGCAGCACGACTTCTTCAAGTCCGCCATGCCCGAAGGCTACGTCCAGGAGCGCACCATCTTCTTCAAGGACGACGGCAACTACAAGACCCGCGCCGAGGTGAAGTTCGAGGGCGACACCCTGGTGAACCGCATCGAGCTGAAGGGCATCGACTTCAAGGAGGACGGCAACATCCTGGGGCACAAGCTGGAGTACAACTACAACAGCCACAACGTCTATATCATGGCCGACAAGCAGAAGAACGGCATCAAGGTGAACTTCAAGATCCGCCACAACATCGAGGACGGCAGCGTGCAGCTCGCCGACCACTACCAGCAGAACACCCCCATCGGCGACGGCCCCGTGCTGCTGCCCGACAACCACTACCTGAGCACCCAGTCCGCCCTGAGCAAAGACCCCAACGAGAAGCGCGATCACATGGTCCTGCTGGAGTTCGTGACCGCCGCCGGGATCACTCTCGGCATGGACGAGCTGTACAAG |

**Table 2.** HumanECRmRNA sequence

| Human  Gla-LG  -CD8-Mertk | Signal Peptide  (SP) | ATGGCCCCTTCGCTCTCGCCCGGGCCCGCCGCCCTGCGCCGCGCGCCGCAGCTGCTGCTGCTGCTGCTGGCCGCGGAGTGCGCGCTTGCC |
| --- | --- | --- |
| Human Gla-LG | TTCGAGGAGGCCAAGCAGGGCCACCTGGAGAGGGAGTGCGTGGAGGAGCTGTGCAGCCGCGAGGAGGCGCGGGAGGTGTTCGAGAACGACCCCGAGACGGATTATTTTTACCCAAGATACTTAGACGGCGGCGGCGGCTCCGGCGGCGGCGGCTCCGGCGGCGGCGGCTCCGGCCGGATGTTCAGTGGGACCCCCGTGATCCGACTGCGCTTCAAGAGGCTGCAGCCCACCAGGCTGGTAGCTGAGTTTGACTTCCGGACCTTTGACCCCGAGGGCATCCTCCTCTTTGCCGGAGGCCACCAGGACAGCACCTGGATCGTGCTGGCCCTGAGAGCCGGCCGGCTGGAGCTGCAGCTGCGCTACAACGGTGTCGGCCGTGTCACCAGCAGCGGCCCGGTCATCAACCATGGCATGTGGCAGACAATCTCTGTTGAGGAGCTGGCGCGGAATCTGGTCATCAAGGTCAACAGGGATGCTGTCATGAAAATCGCGGTGGCCGGGGACTTGTTCCAACCGGAGCGAGGACTGTATCATCTGAACCTGACCGTGGGAGGTATTCCCTTCCATGAGAAGGACCTCGTGCAGCCTATAAACCCTCGTCTGGATGGCTGCATGAGGAGCTGGAACTGGCTGAACGGAGAAGACACCACCATCCAGGAAACGGTGAAAGTGAACACGAGGATGCAGTGCTTCTCGGTGACGGAGAGAGGCTCTTTCTACCCCGGGAGCGGCTTCGCCTTCTACAGCCTGGACTACATGCGGACCCCTCTGGACGTCGGGACTGAATCAACCTGGGAAGTAGAAGTCGTGGCTCACATCCGCCCAGCCGCAGACACAGGCGTGCTGTTTGCGCTCTGGGCCCCCGACCTCCGTGCCGTGCCTCTCTCTGTGGCACTGGTAGACTATCACTCCACGAAGAAACTCAAGAAGCAGCTGGTGGTCCTGGCCGTGGAGCATACGGCCTTGGCCCTAATGGAGATCAAGGTCTGCGACGGCCAAGAGCACGTGGTCACCGTCTCGCTGAGGGACGGTGAGGCCACCCTGGAGGTGGACGGCACCAGGGGCCAGAGCGAGGTGAGCGCCGCGCAGCTGCAGGAGAGGCTGGCCGTGCTCGAGAGGCACCTGCGGAGCCCCGTGCTCACCTTTGCTGGCGGCCTGCCAGATGTGCCGGTGACTTCAGCGCCAGTCACCGCGTTCTACCGCGGCTGCATGACACTGGAGGTCAACCGGAGGCTGCTGGACCTGGACGAGGCGGCGTACAAGCACAGCGACATCACGGCCCACTCCTGC |
| Flag | GATTACAAGGATGATGATGATAAGGATTACAAGGATGATGATGATAAGTAATAG |
| Human CD8a hinge | GCGAAGCCCACCACGACGCCAGCGCCGCGACCACCAACACCGGCGCCCACCATCGCGTCGCAGCCCCTGTCCCTGCGCCCAGAGGCGTGCCGGCCAGCGGCGGGGGGCGCAGTGCACACGAGGGGGCTGGACTTCGCCTGTGAT |
| Human Mertk TM  and activation domain | TTTGGCTGCTTTTGTGGATTTATTTTGATTGGGTTGATTTTATACATCTCCTTGGCCATCAGAAAAAGAGTCCAGGAGACAAAGTTTGGGAATGCATTCACAGAGGAGGATTCTGAATTAGTGGTGAATTATATAGCAAAGAAATCCTTCTGTCGGCGAGCCATTGAACTTACCTTACATAGCTTGGGAGTCAGTGAGGAACTACAAAATAAACTAGAAGATGTTGTGATTGACAGGAATCTTCTAATTCTTGGAAAAATTCTGGGTGAAGGAGAGTTTGGGTCTGTAATGGAAGGAAATCTTAAGCAGGAAGATGGGACCTCTCTGAAAGTGGCAGTGAAGACCATGAAGTTGGACAACTCTTCACAGCGGGAGATCGAGGAGTTTCTCAGTGAGGCAGCGTGCATGAAAGACTTCAGCCACCCAAATGTCATTCGACTTCTAGGTGTGTGTATAGAAATGAGCTCTCAAGGCATCCCAAAGCCCATGGTAATTTTACCCTTCATGAAATACGGGGACCTGCATACTTACTTACTTTATTCCCGATTGGAGACAGGACCAAAGCATATTCCTCTGCAGACACTATTGAAGTTCATGGTGGATATTGCCCTGGGAATGGAGTATCTGAGCAACAGGAATTTTCTTCATCGAGATTTAGCTGCTCGAAACTGCATGTTGCGAGATGACATGACTGTCTGTGTTGCGGACTTCGGCCTCTCTAAGAAGATTTACAGTGGCGATTATTACCGCCAAGGCCGCATTGCTAAGATGCCTGTTAAATGGATCGCCATAGAAAGTCTTGCAGACCGAGTCTACACAAGTAAAAGTGATGTGTGGGCATTTGGCGTGACCATGTGGGAAATAGCTACGCGGGGAATGACTCCCTATCCTGGGGTCCAGAACCATGAGATGTATGACTATCTTCTCCATGGCCACAGGTTGAAGCAGCCCGAAGACTGCCTGGATGAACTGTATGAAATAATGTACTCTTGCTGGAGAACCGATCCCTTAGACCGCCCCACCTTTTCAGTATTGAGGCTGCAGCTAGAAAAACTCTTAGAAAGTTTGCCTGACGTTCGGAACCAAGCAGACGTTATTTACGTCAATACACAGTTGCTGGAGAGCTCTGAGGGCCTGGCCCAGGGCTCCACCCTTGCTCCACTGGACTTGAACATCGACCCTGACTCTATAATTGCCTCCTGCACTCCCCGCGCTGCCATCAGTGTGGTCACAGCAGAAGTTCATGACAGCAAACCTCATGAAGGACGGTACATCCTGAATGGGGGCAGTGAGGAATGGGAAGATCTGACTTCTGCCCCCTCTGCTGCAGTCACAGCTGAAAAGAACAGTGTTTTACCGGGGGAGAGACTTGTTAGGAATGGGGTCTCCTGGTCCCATTCGAGCATGCTGCCCTTGGGAAGCTCATTGCCCGATGAACTTTTGTTTGCTGACGACTCCTCAGAAGGCTCAGAAGTCCTGATG |
| GFP | ATGGTGAGCAAGGGCGAGGAGCTGTTCACCGGGGTGGTGCCCATCCTGGTCGAGCTGGACGGCGACGTAAACGGCCACAAGTTCAGCGTGTCCGGCGAGGGCGAGGGCGATGCCACCTACGGCAAGCTGACCCTGAAGTTCATCTGCACCACCGGCAAGCTGCCCGTGCCCTGGCCCACCCTCGTGACCACCCTGACCTACGGCGTGCAGTGCTTCAGCCGCTACCCCGACCACATGAAGCAGCACGACTTCTTCAAGTCCGCCATGCCCGAAGGCTACGTCCAGGAGCGCACCATCTTCTTCAAGGACGACGGCAACTACAAGACCCGCGCCGAGGTGAAGTTCGAGGGCGACACCCTGGTGAACCGCATCGAGCTGAAGGGCATCGACTTCAAGGAGGACGGCAACATCCTGGGGCACAAGCTGGAGTACAACTACAACAGCCACAACGTCTATATCATGGCCGACAAGCAGAAGAACGGCATCAAGGTGAACTTCAAGATCCGCCACAACATCGAGGACGGCAGCGTGCAGCTCGCCGACCACTACCAGCAGAACACCCCCATCGGCGACGGCCCCGTGCTGCTGCCCGACAACCACTACCTGAGCACCCAGTCCGCCCTGAGCAAAGACCCCAACGAGAAGCGCGATCACATGGTCCTGCTGGAGTTCGTGACCGCCGCCGGGATCACTCTCGGCATGGACGAGCTGTACAAG |

**Table 3.** Primers for RT-qPCR analysis in mice

| **Gene** | | **Sense** | | **Anti-sense** | |
| --- | --- | --- | --- | --- | --- |
| β-actin | | GTGACGTTGACATCCGTAAAGA | | GCCGGACTCATCGTACTCC | |
| ECR | | ATGAAGATCGCGGTAGCTGG | | CCAACTCCTCATGCACCCAT | |
| iNOS | | GTTCTCAGCCCAACAATACAAGA | | GTGGACGGGTCGATGTCAC | |
| IL-1β | | GAAATGCCACCTTTTGACAGTG | | TGGATGCTCTCATCAGGACAG | |
| IL-6  Arg-1  IL-10  YM-1  PI3k  AKT  ERK | | TAGTCCTTCCTACCCCAATTTCC  CTCCAAGCCAAAGTCCTTAGAG  CTTACTGACTGGCATGAGGATCA  CAGCTGGGATCTTCCTACCA  AGGACTGCTGCTGATGATGA  GACGACGTGGCTATTGTGAAG  ACCTGCTGTTCAAGCAGTCC | | TTGGTCCTTAGCCACTCCTTC  AGGAGCTGTCATTAGGGACATC  GCAGCTCTAGGAGCATGTGG  ATTCTGCATTCCAGCAAGG  CTGCTGGTAGGTGATGTTGG  CGGATGGCACGTGTTCTTAT  TCTGCTGGTAGGTGTTGGTG | |
